# Supplementary material
Source: PubMed Central journal article supplement (PMC4041199)
Supplement: NIHMS577543-supplement-Supplementary_Data.pdf [file NIHMS577543-supplement-Supplementary_Data.pdf]

# Supplementary Information

**Journal:** Nature Medicine

|                              |                                                                                                                                 |
|------------------------------|---------------------------------------------------------------------------------------------------------------------------------|
| <b>Article Title:</b>        | <b>Renal tubular Sirt1 attenuates diabetic albuminuria by epigenetically suppressing Claudin-1 overexpression in podocytes.</b> |
| <b>Corresponding Author:</b> | Shu Wakino                                                                                                                      |

| <b>Supplementary Item &amp; Number</b> | <b>Title</b>                                                                                                                                                                                         |
|----------------------------------------|------------------------------------------------------------------------------------------------------------------------------------------------------------------------------------------------------|
| Supplementary Figure 1                 | Phenotypes of proximal tubule-specific <i>Sirt1</i> transgenic mice.                                                                                                                                 |
| 2                                      | Expression of genes of specific interest identified by GeneChip in whole kidneys of proximal tubule-specific <i>Sirt1</i> transgenic mice after STZ treatment.                                       |
| 3                                      | Immunogold electron micrographs for Claudin-1.                                                                                                                                                       |
| 4                                      | Expression of Sirt1 and Claudin-1 in proximal tubule-specific <i>Sirt1</i> -deficient mice after STZ treatment and phenotypes of proximal tubule-specific <i>Sirt1</i> transgenic <i>db/db</i> mice. |
| 5                                      | The epigenetic regulation of the <i>Claudin-1</i> gene in HRE cells and in the kidneys of mice with streptozotocin-induced diabetes.                                                                 |
| 6                                      | Conditioned medium experiment from HK-2 cells cultured in high mannitol medium and NMN levels in proximal tubule-specific <i>Sirt1</i> -deficient mice (CKO).                                        |
| 7                                      | Effects of inhibition of iNampt in mice with streptozotocin-induced diabetes.                                                                                                                        |
| 8                                      | Schema depicting the retrograde interplay mediated by NMN.                                                                                                                                           |
| Supplementary Figure Legends           |                                                                                                                                                                                                      |
| Supplementary Results                  | Effects of osmotic changes owing to high glucose medium in CM experiments                                                                                                                            |
| Supplementary Table 1                  | Genes that were up-regulated in the kidneys of TG+STZ mice compared with WT+STZ mice.                                                                                                                |
| 2                                      | Genes that were down-regulated in the kidneys of TG+STZ mice compared with WT+STZ mice                                                                                                               |
| 3                                      | Clinical data of patients with diabetes and normal controls                                                                                                                                          |
| 4                                      | Sequences used for real-time PCR                                                                                                                                                                     |
| 5                                      | Primer sequences used for real-time PCR                                                                                                                                                              |
| 6                                      | Primer sequences used for methylation-specific PCR                                                                                                                                                   |

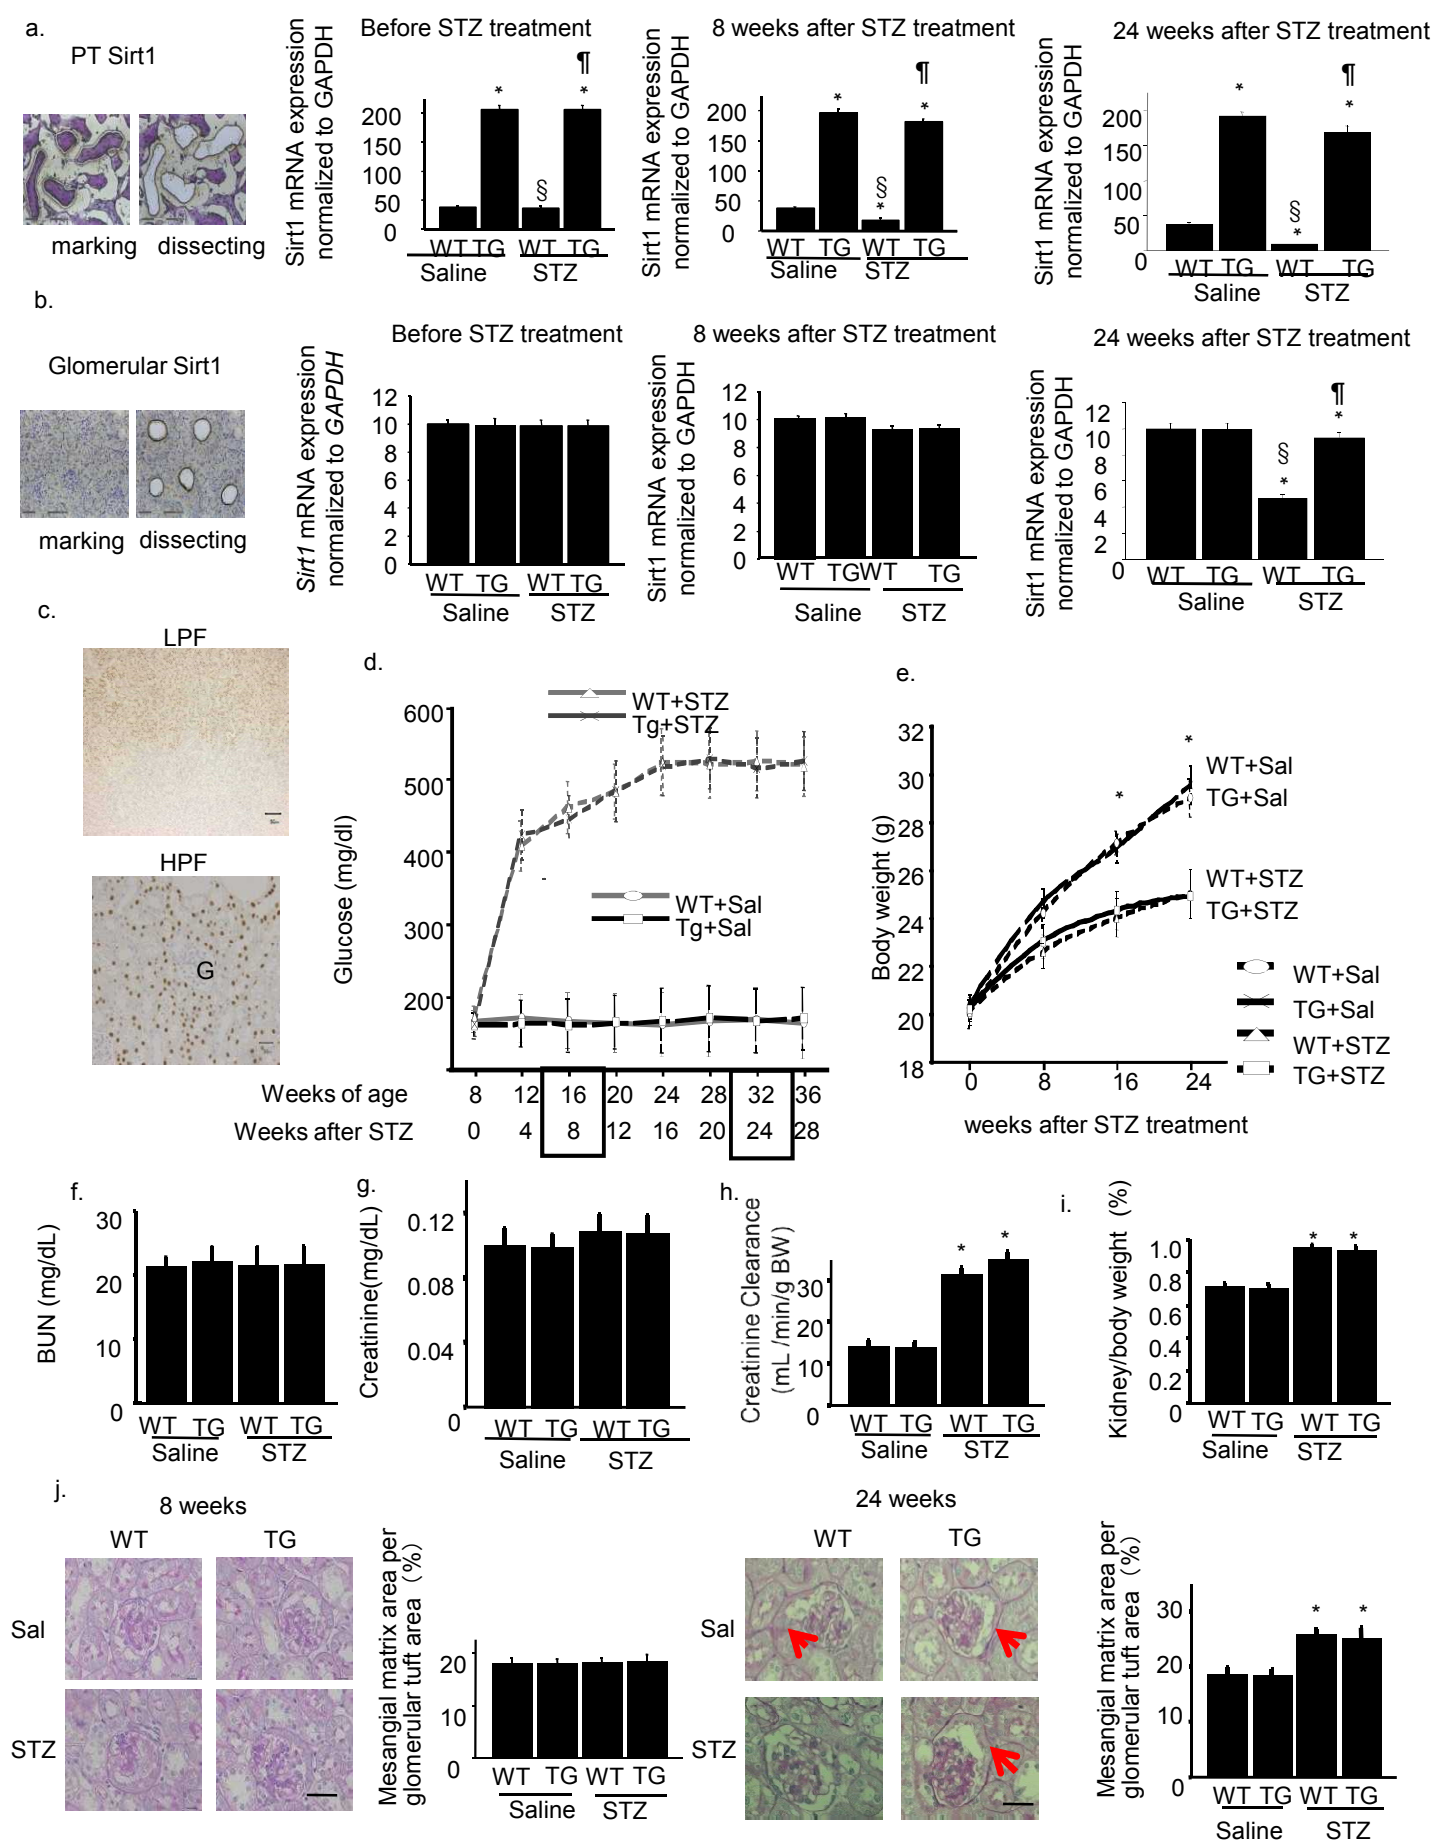

Supplementary Fig. 1, Hasegawa et al.

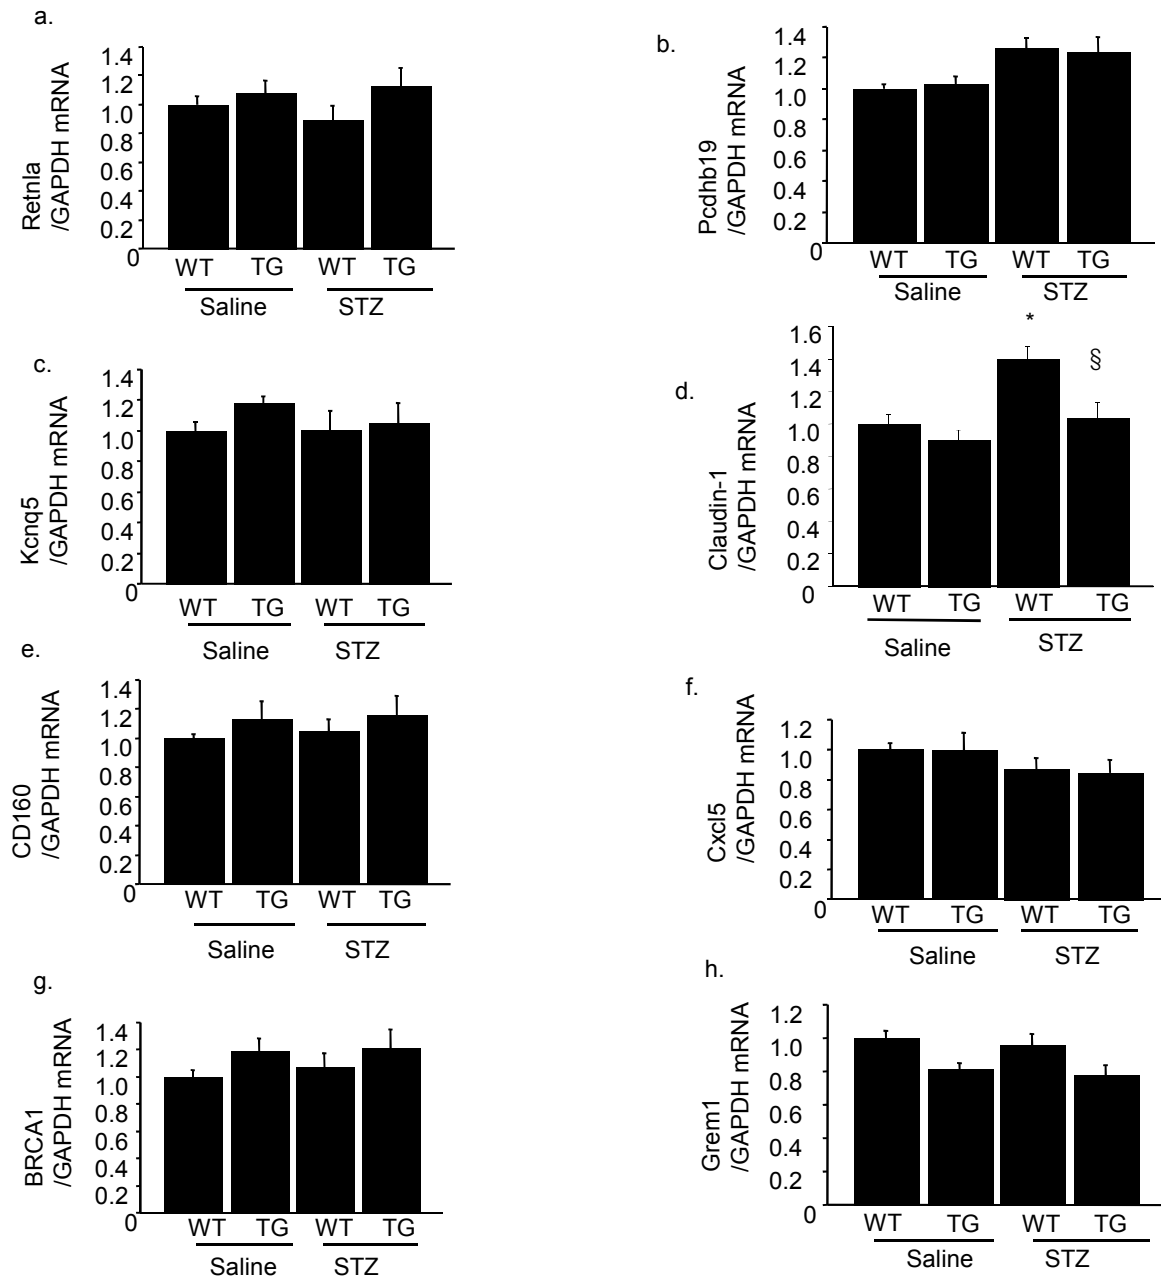

Supplementary Fig. 2, Hasegawa et al.

a.

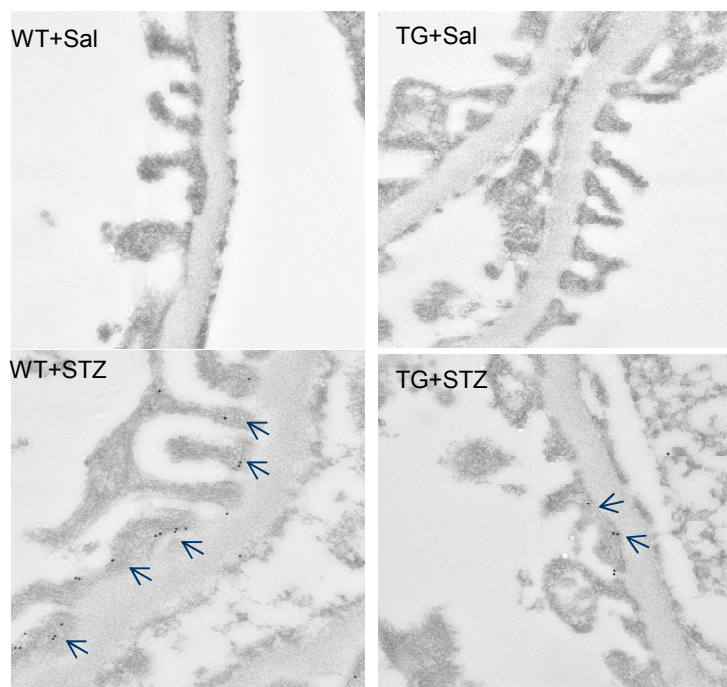

b.

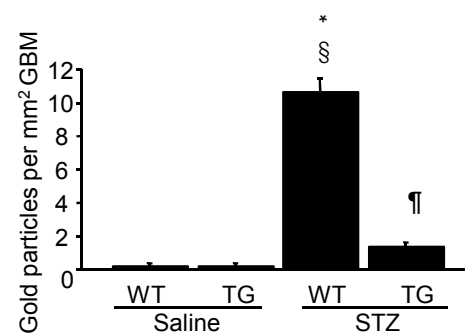

c.

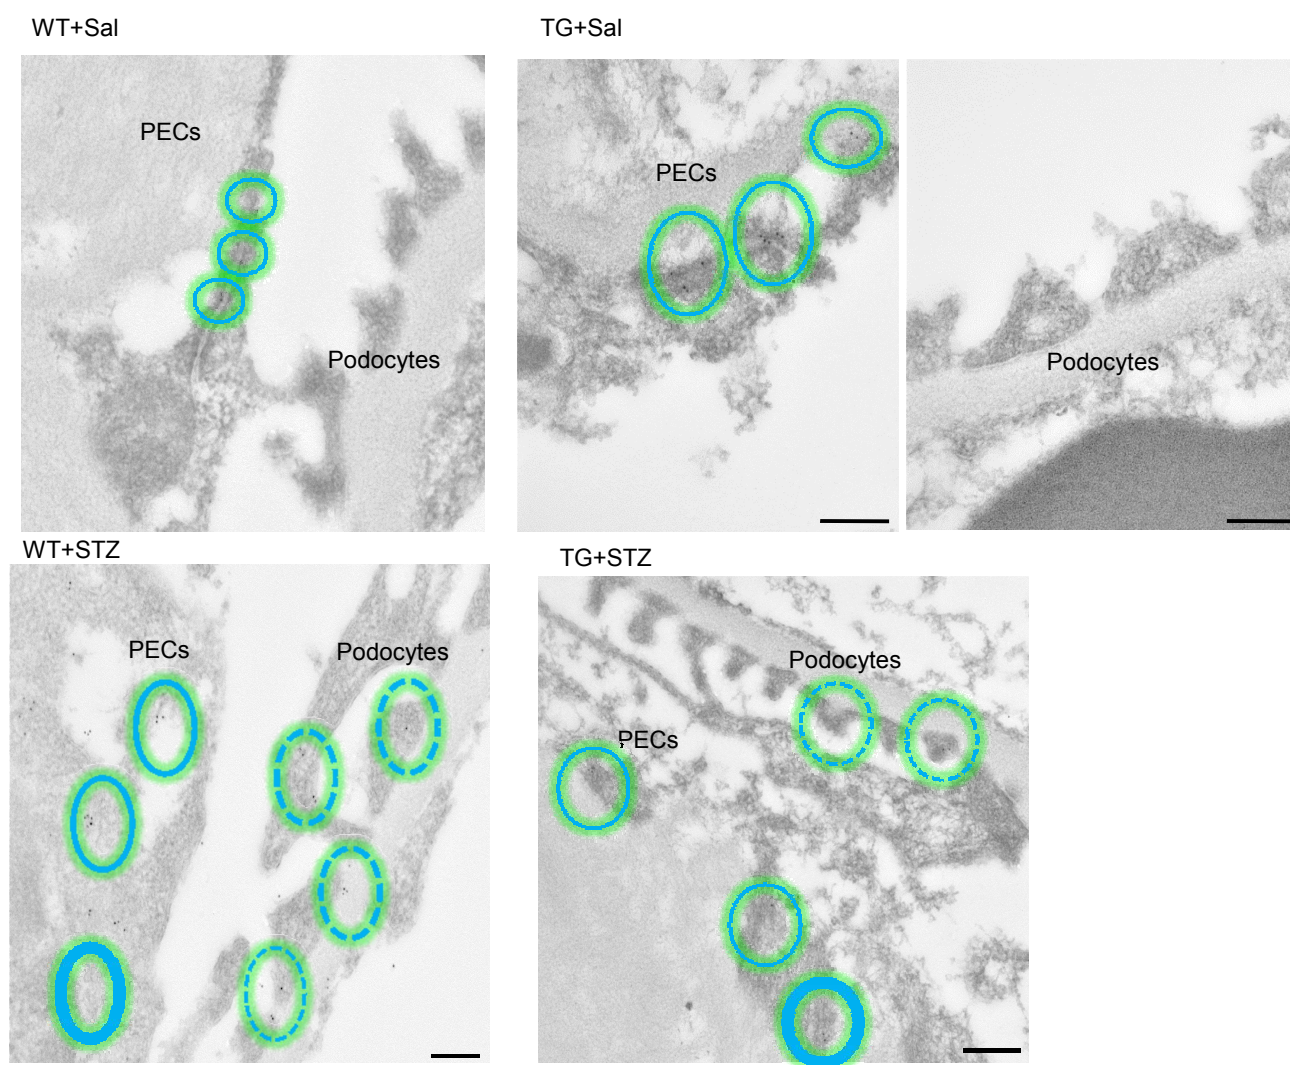

Supplementary Fig. 3, Hasegawa et al.

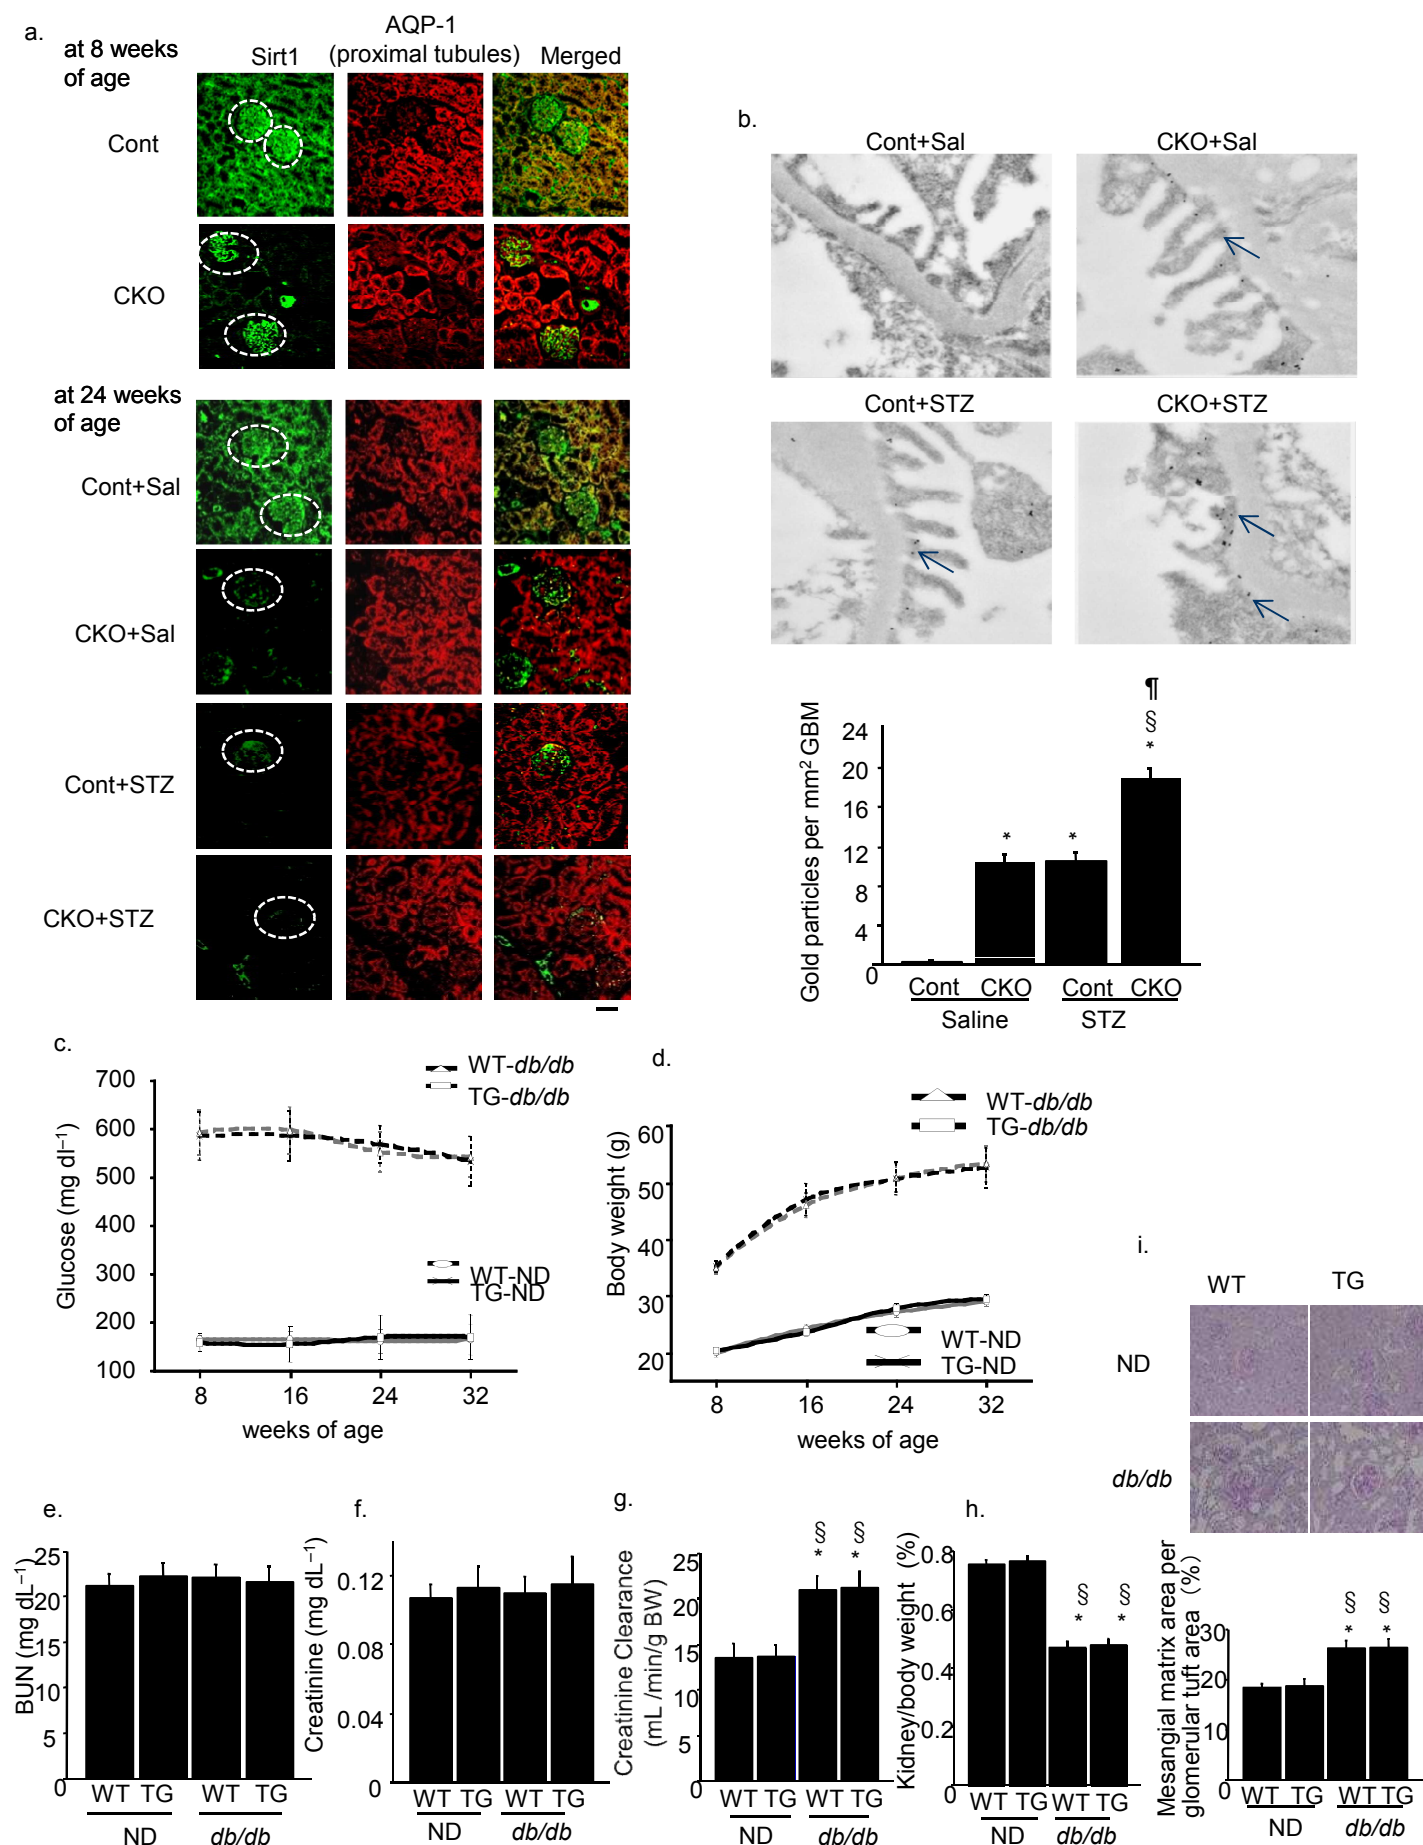

Supplementary Fig. 4, Hasegawa et al.

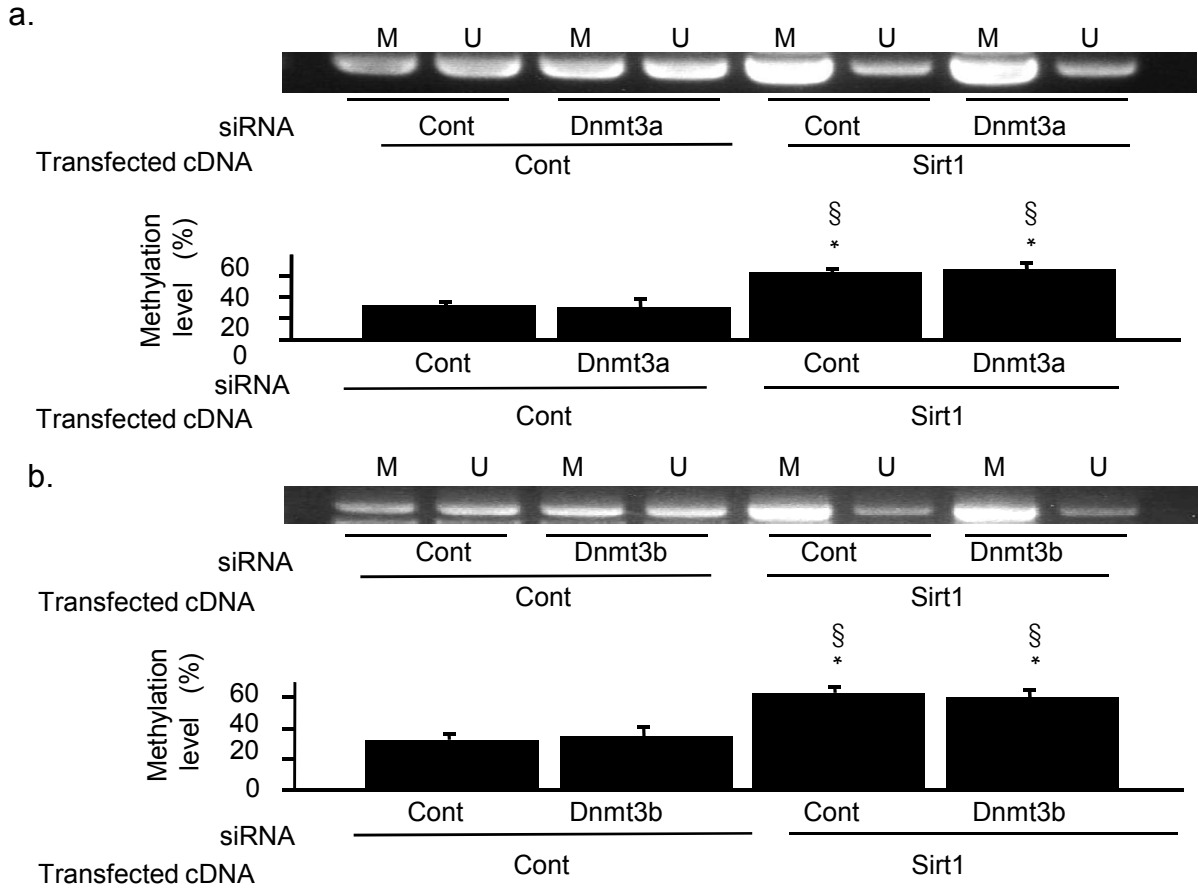

**c.**

ccagaagccaggagcct cgccccgcagctgcacagagagcaagggata  
 ggcactaactgtttgcagagaccccatcaccttcgggagctcaggtgcga  
 ①② ③  
 ccttgcaaactccacttttgcacatgccactgagcccgcgaggagcctcgga  
 start codon ④⑤  
 agagccatggccaaacgctgggctgcagctgctgggtttcatcctggtctct  
 ⑥ ⑦  
 gggatggatcggtccatcgctcagcactgccctgccccagtggaagattact  
 ⑧ ⑨ ⑩  
 cctatgctggggacaacatcgtagccgctcaggccatctaagggactgtg  
 ⑪ ⑫ ⑬ ⑭  
 gatgtcctgcttgcgcaagcaacgggcagatacagtgcaaggtctcgact  
 ccttgctgaatctgaacagctactttgcaggcaacccgagccttgatggaattg  
 gcatcctgctggggctgacgcaatcttgtgtccaccattggcatgaagtgcac

**d.**

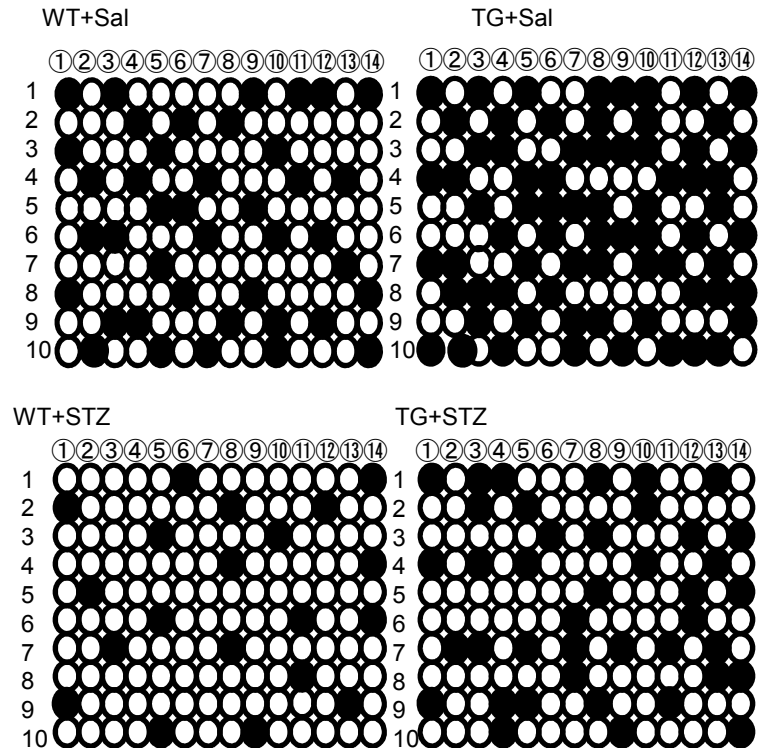

Supplementary Fig. 5, Hasegawa et al.

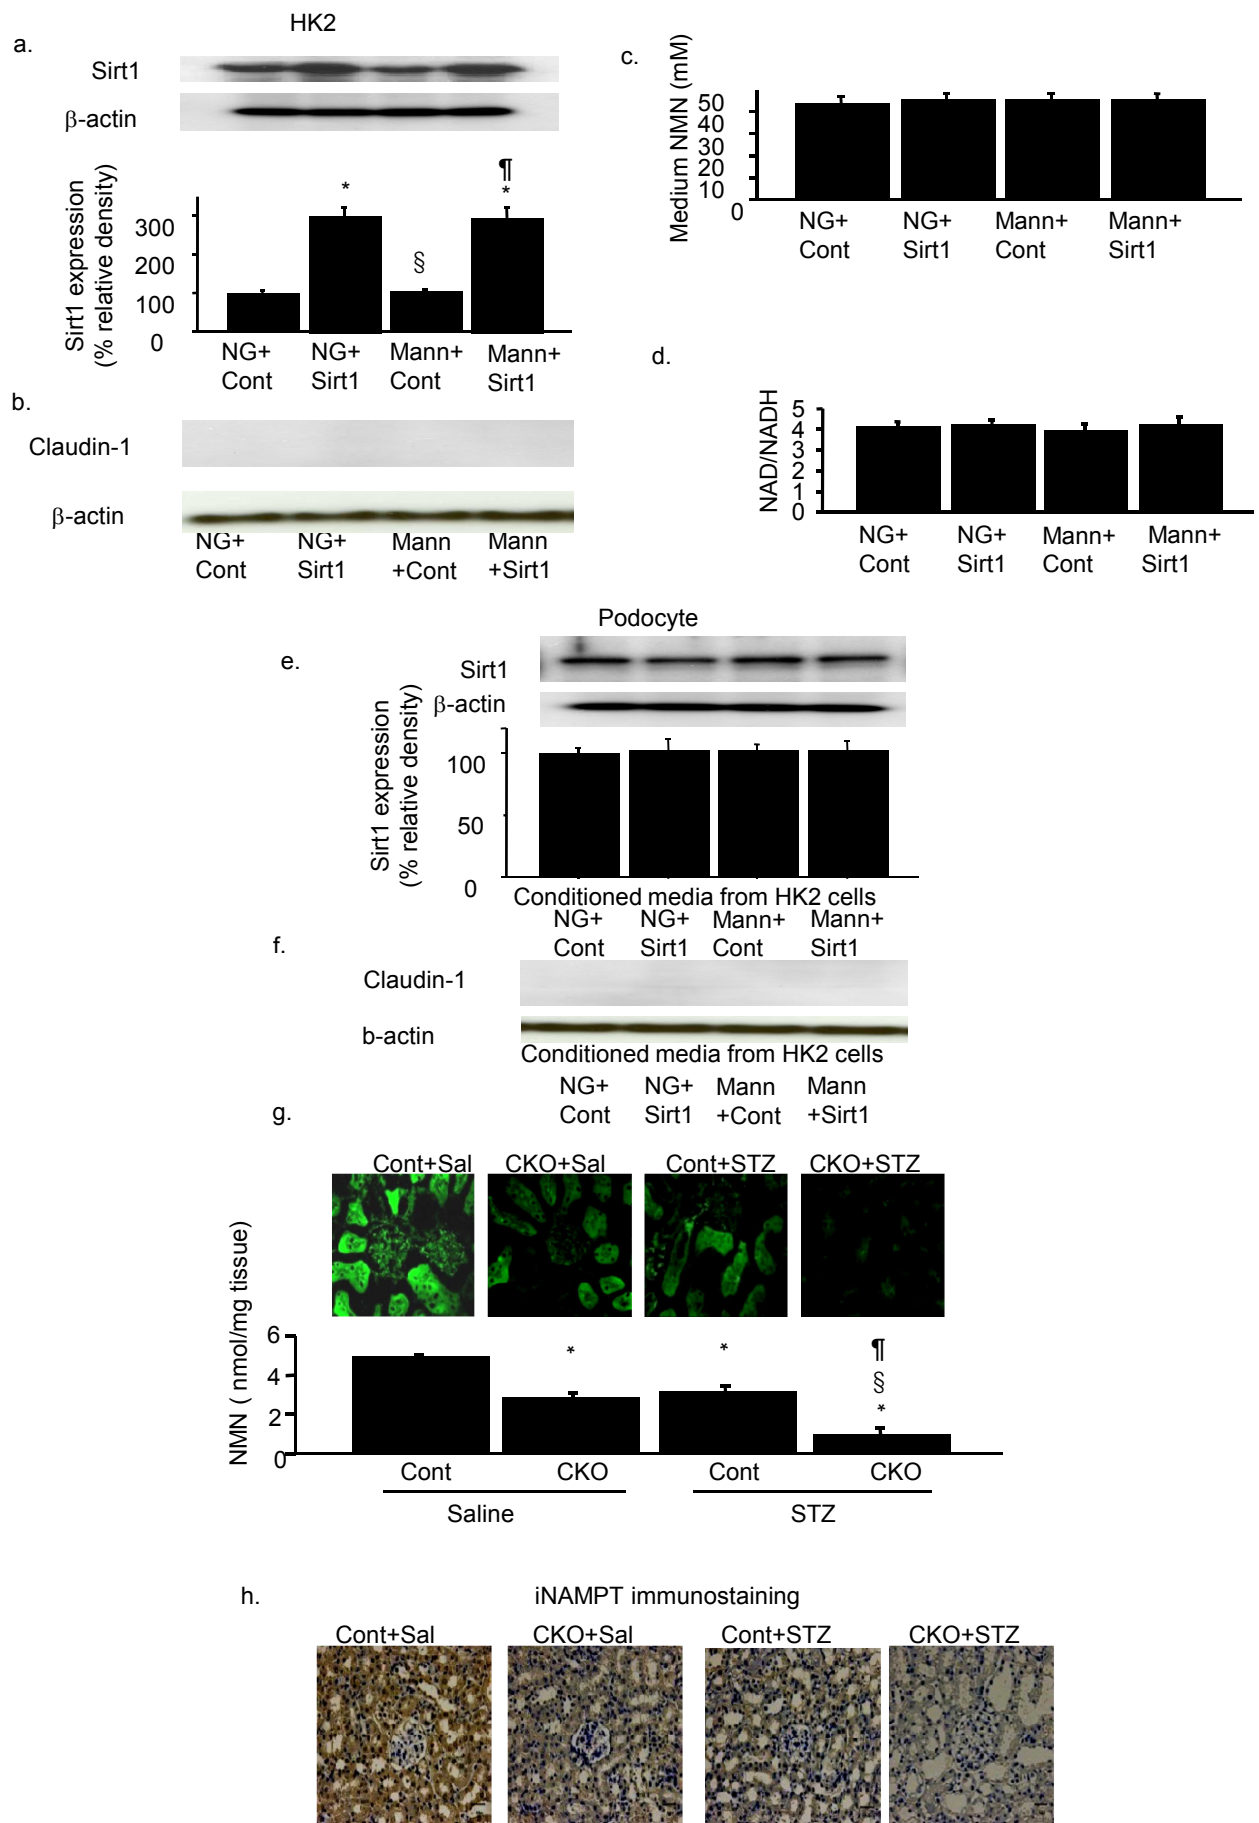

Supplementary Fig. 6, Hasegawa et al.

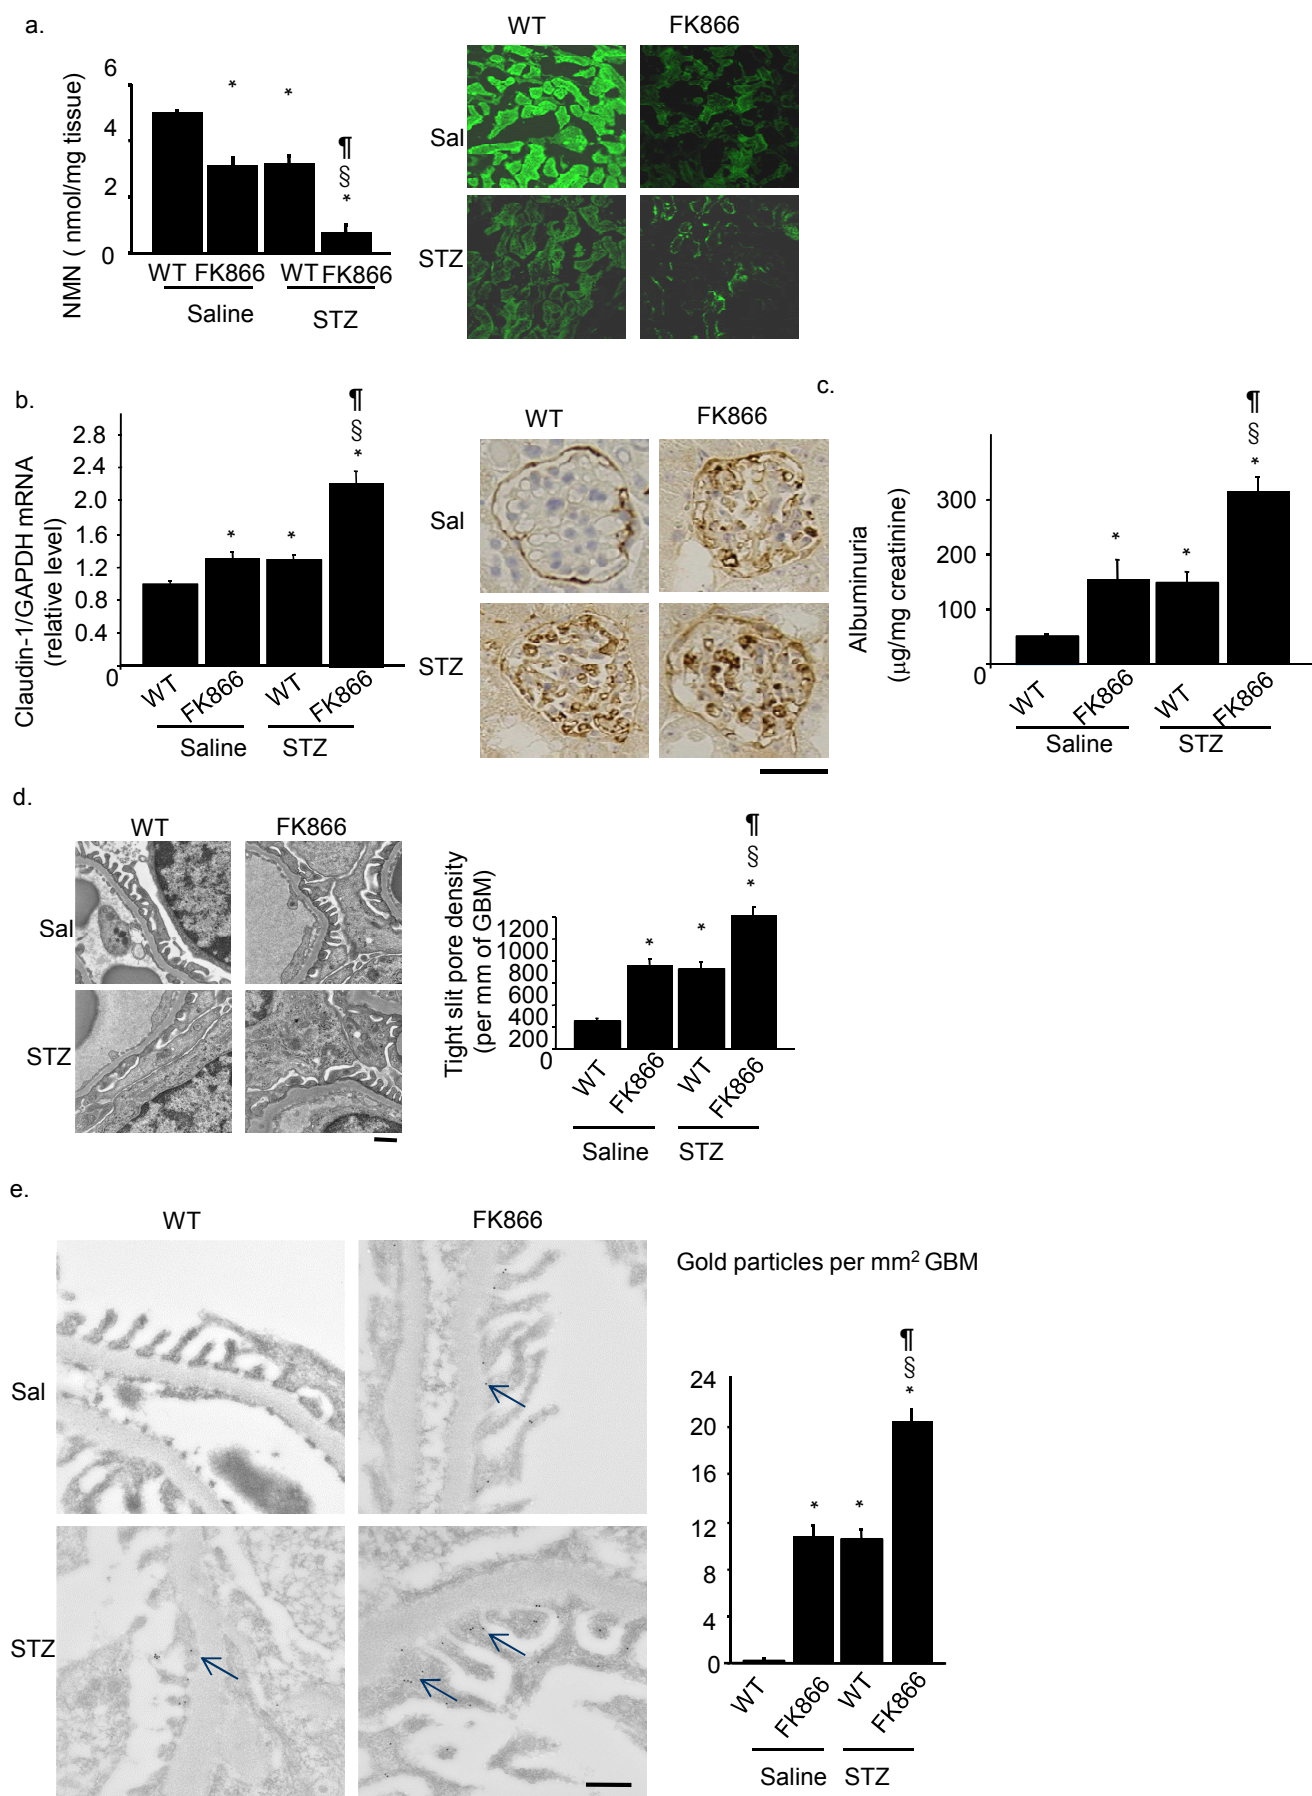

Supplementary Fig. 7, Hasegawa et al.

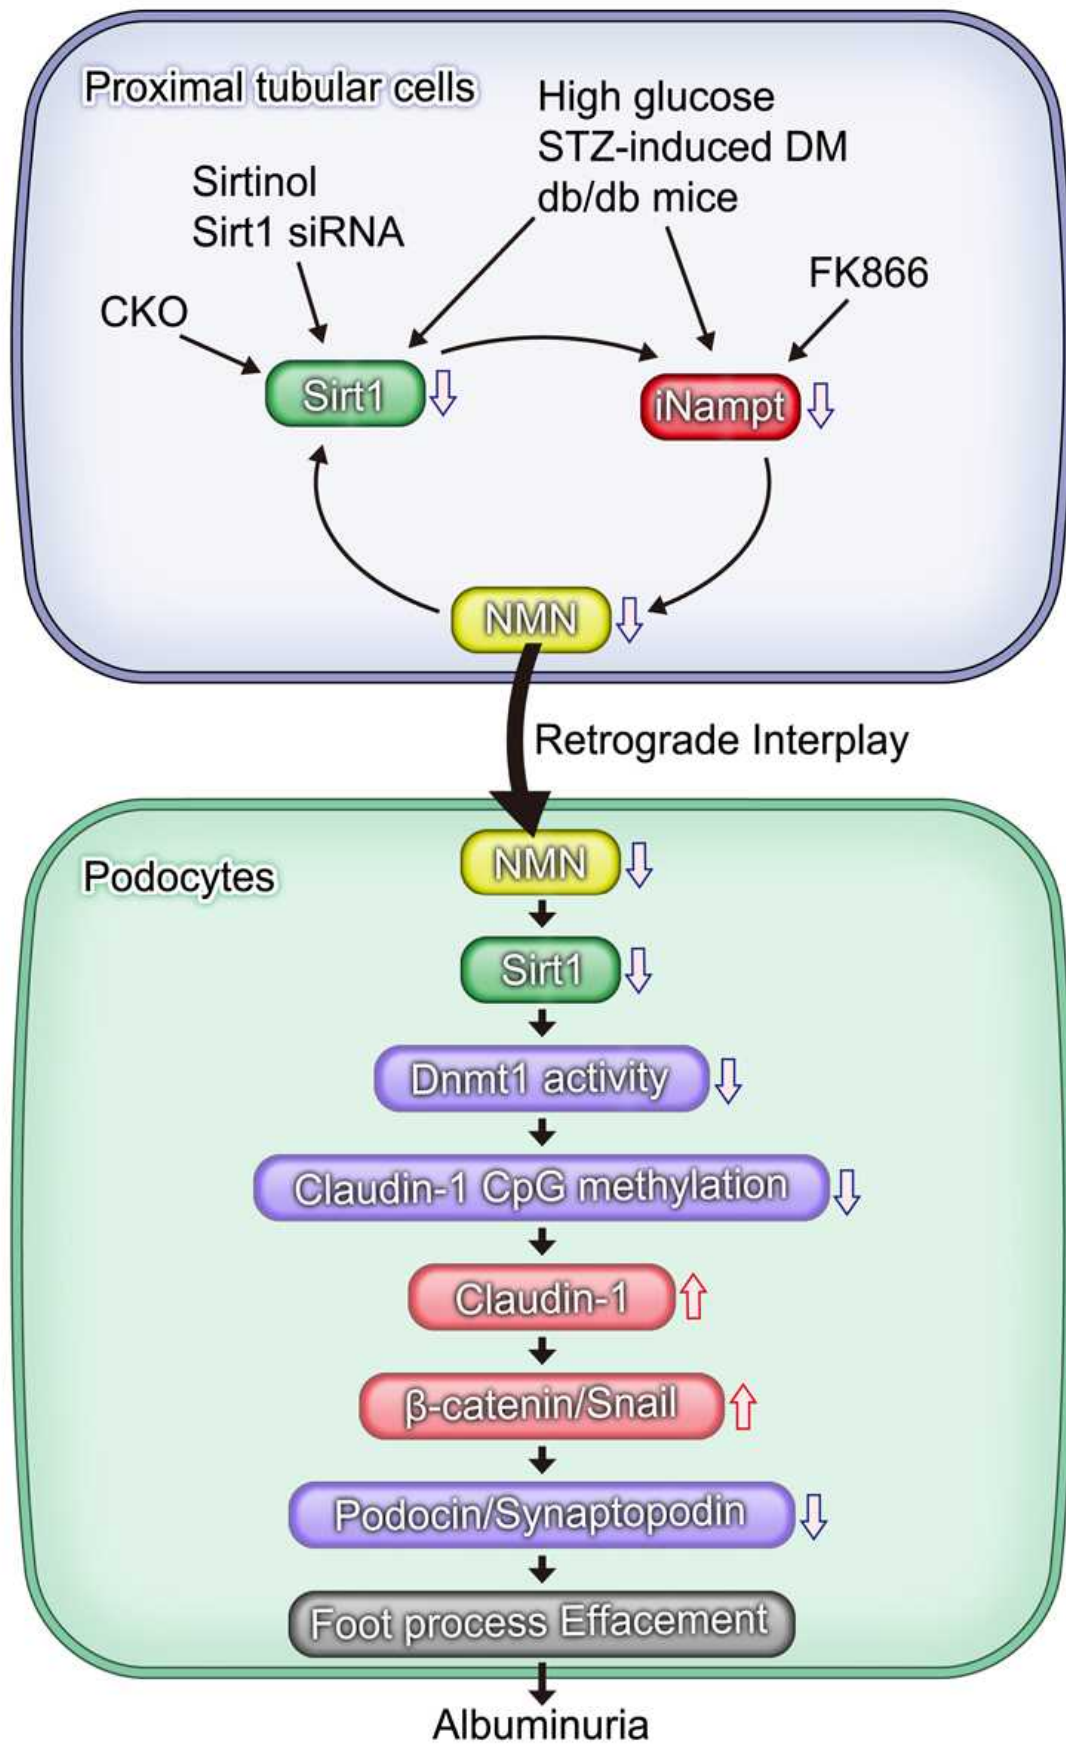

### Supplementary Figure Legends

**Supplementary Figure 1** Phenotypes of proximal tubule-specific *Sirt1* transgenic mice. **(a, b)** Renal cell-specific changes in *Sirt1* **(a)** and *Claudin-1* **(b)** mRNA expression in proximal tubule-specific *Sirt1* transgenic mice (TG) and wild-type mice (WT). We successfully marked and dissected different nephron segments including proximal tubular (PT) cells and glomeruli. The levels of mRNAs for *Sirt1* and *Claudin-1* were measured by real-time PCR in TG and WT mice before, 8 weeks and 24 weeks after streptozotocin (STZ) or saline (Sal) treatment. \* $P < 0.05$  vs. WT+Sal, § $P < 0.05$  vs. TG+Sal, ¶ $P < 0.05$  vs. WT+STZ,  $n = 8$ . **(c)** Predominant *Sirt1* expression in proximal tubules in the kidneys of TG mice assessed by immunostaining for FLAG. Scale bars, 500  $\mu\text{m}$  (upper panel; low power field, LPF,  $\times 100$ ) and 100  $\mu\text{m}$  (lower panel; high power field, HPF,  $\times 400$ ). **(d)** Temporal changes in mean plasma glucose concentrations in mice in each group. We sacrificed the mice 8 weeks and 24 weeks after treatment, corresponding to 16 and 32 weeks of age (black boxes). **(e)** Body weight changes from 0 to 24 weeks after STZ or Sal treatment in WT or TG mice. Plasma BUN **(f)** and plasma creatinine **(g)** concentrations, creatinine clearance **(h)** and the ratio of kidney weight to body weight **(i)** of mice in each experimental group. **(j)** Representative PAS staining 8 weeks (left) and 24 weeks (right) after STZ treatment. The bar graph shows the quantification of mesangial matrix deposition indicated as the ratio to glomerular tuft area. Scale bar, 50  $\mu\text{m}$ . \*\*  $P < 0.01$  vs. WT+Sal, \*  $P < 0.05$  vs. WT+Sal.  $n = 8$ .

**Supplementary Figure 2** Expression of genes of specific interest identified by GeneChip in whole kidneys of proximal tubule-specific *Sirt1* transgenic mice after STZ treatment. Changes in expression of the genes identified by GeneChip were examined using whole kidney samples and real-time PCR. Expression of *Retnla* **(a)**, *Pcdhb19* **(b)**, *Kcnq5* **(c)**, *Claudin-1* **(d)**, *CD160* **(e)**, *Cxcl5* **(f)**, *BRCA1* **(g)**, and *Grem1* **(h)** in whole kidney.  $n = 8$ .

**Supplementary Figure 3** Immunogold electron micrographs for Claudin-1. **(a)** Representative

immunogold electron micrographs for Claudin-1 in the kidney of proximal tubule-specific *Sirt1* transgenic mice (TG) or wild-type mice (WT) after streptozotocin (STZ) or saline (Sal) treatment. Arrows indicate immunogold particles. Scale bar, 0.5  $\mu\text{m}$ . **(b)** Numbers of gold particles  $\mu\text{m}^{-2}$  glomerular basement membrane (GBM). \* $P < 0.05$  vs. WT+Sal, § $P < 0.05$  vs. TG+Sal, ¶ $P < 0.05$  vs. WT+STZ,  $n = 8$ . **(c)** Representative immunogold electron micrographs for Claudin-1 for each group of mice. Claudin-1 expression was detectable in PECs and was undetectable in podocytes in non-diabetic, WT+Sal or TG+Sal mice. Higher levels of Claudin-1 were seen in the PECs and podocytes of WT+STZ mice compared with WT+Sal mice, but lower levels were seen in these regions in TG+STZ mice compared with TG+Sal mice. Blue ovals indicate immunogold particles. Scale bar, 0.5  $\mu\text{m}$ .

**Supplementary Figure 4** Expression of *Sirt1* and Claudin-1 in proximal tubule-specific *Sirt1*-deficient mice after STZ treatment and phenotypes of proximal tubule-specific *Sirt1* transgenic *db/db* mice. **(a)** Kidney cryosections derived from proximal tubule (PT)-specific *Sirt1*-deficient mice (CKO) or control mice (cont) treated with streptozotocin (STZ) or saline (Sal) were subjected to fluorescence immunohistochemistry staining for *Sirt1* (green color) by applying the monoclonal anti-*Sirt1* antibody and staining with anti-AQP1 (red color), a PT marker. White dotted lines highlight glomeruli. Scale bar, 20  $\mu\text{m}$ . Upper panel; Cont and CKO mice at 8 weeks of age. Lower panel; Cont+Sal, CKO+Sal, CKO+Sal, and CKO+STZ mice at 24 weeks after treatment (e.g., at 32 weeks of age). **(b)** Representative immunogold electron micrographs for Claudin-1. Arrows indicate immunogold particles for Claudin-1 protein. Scale bar, 0.5  $\mu\text{m}$ . The bar graph shows the numbers of gold particles  $\mu\text{m}^{-2}$  glomerular basement membrane (GBM). \* $P < 0.05$  vs. Cont+Sal, § $P < 0.05$  vs. CKO+Sal, ¶ $P < 0.05$  vs. Cont+STZ,  $n = 8$ . **(c-i)** We crossed our proximal tubule-specific *Sirt1* transgenic mice (TG) with obese *db/db* mice (*db/db*). Fasting blood glucose levels **(c)** and body weight **(d)** in WT-*db/db* and TG-*db/db* mice as compared with those in nondiabetic mice (WT-ND and TG-ND). Plasma BUN **(e)** and plasma creatinine **(f)** concentrations,

creatinine clearance (**g**) and the ratio of kidney weight to body weight (**h**) in each group of mice. \* $P < 0.05$  vs. WT-ND, § $P < 0.05$  vs. TG-ND,  $n = 8$ . (**i**) Representative PAS staining of kidney in mice at 32 weeks of age. The bar graph lower panel shows the quantification of mesangial matrix deposition indicated as the ratio to glomerular tuft area. Scale bar; 50  $\mu\text{m}$ . \*  $P < 0.05$  vs. WT-ND, §  $P < 0.05$  vs. TG-ND.  $n = 8$ .

**Supplementary Figure 5** The epigenetic regulation of the *Claudin-1* gene in HRE cells and in the kidneys of mice with streptozotocin-induced diabetes. (**a,b**) The involvement of Dnmt in Sirt1-mediated *Claudin-1* gene methylation. Methylation of the *Claudin-1* gene was examined with or without the transfection of *Sirt1* expression vectors. SiRNA for *Dnmt3a* (**a**) or *Dnmt3b* (**b**) was co-transfected. The bar graph shows the results of densitometry analysis. \* $p < 0.05$  vs. control cDNA and control siRNA-transfected cells, § $p < 0.05$  vs. control cDNA and *Dnmt* siRNA-transfected cells,  $n = 5$ . M indicates methylated DNA, and U indicates unmethylated DNA. (**c**) CpG islands on the *Claudin-1* gene. Each number indicates the position of a CpG island. (**d**) Bisulfite genomic sequencing (BGS) of the micro-dissected PECs in proximal tubule-specific *Sirt1* transgenic mice (TG) with STZ or saline (Sal) treatment. Each box is representative of the indicated mouse group; each row of dots in the boxes is representative of the *Claudin-1* CpG island; each dot is representative of a single CpG. Empty dots indicate unmethylated CpGs; black dots indicate methylated CpGs. Each row represents a single sequenced clone (ten for each group of mice).

**Supplementary Figure 6** Conditioned medium experiment from HK-2 cells cultured in high mannitol medium and NMN levels in proximal tubule-specific *Sirt1*-deficient mice (CKO). (**a–f**) HK-2 cells were cultured under the four conditions of NG (normal glucose)+Cont (control vector), NG+Sirt1 (*Sirt1* expression vector), Mann (high mannitol)+Cont and Mann+Sirt1. (**a**) Immunoblotting for *Sirt1* (upper panel) and densitometry analysis of the results (lower panel). (**b**) Immunoblotting for *Claudin-1*. (**c,d**) NMN levels(**c**) and NAD/NADH ratio (**d**) of each conditioned

medium from HK-2 cells. **(e,f)** Podocytes were cultured in the conditioned media from these HK-2 cells. Sirt1 expression **(e)** and Claudin-1 expression **(f)** in podocytes were examined.  $*P < 0.05$  vs. NG+Cont,  $\$P < 0.05$  vs. NG+Sirt1,  $\P P < 0.05$  vs. Mann+Cont,  $n = 5$ . **(g, h)** Tissue NMN levels **(g)** and iNAMPT immunostaining **(h)** among four groups of mice (Cont+Sal, CKO+Sal, Cont-STZ and CKO+STZ).  $*P < 0.05$  vs. Cont+Sal,  $\P P < 0.05$  vs. Cont+STZ,  $n = 5$ .

**Supplementary Figure 7** Effects of inhibition of iNampt in mice with streptozotocin-induced diabetes. **(a)** Tissue NMN levels among four groups of mice (WT+Sal, FK866+Sal, WT+STZ and FK866+STZ).  $n = 5$ . Representative intracellular autofluorescence images of NMN in the kidney of each group of mice are shown in the right panel. **(b)** Immunostaining for Claudin-1 in kidneys from each experimental group. The left panel shows mRNA expression for *Claudin-1*. Scale bar, 50  $\mu\text{m}$ . **(c)** Albuminuria of mice in each experimental group.  $n = 8$ . **(d)** Electron photomicrographs (30,000  $\times$  magnification) of the kidneys of mice in each experimental group. The bar graph shows the tight slit pore densities. Scale bar, 500 nm. **(e)** Representative immunogold electron micrographs for Claudin-1. Arrows indicate immunogold particles for Claudin-1 molecules. Scale bar, 0.5  $\mu\text{m}$ . The bar graph shows the numbers of gold particles  $\mu\text{m}^{-2}$  glomerular basement membrane (GBM). **(a-e)**  $*P < 0.05$  vs. WT+Sal,  $\$P < 0.05$  vs. FK866+Sal,  $\P P < 0.05$  vs. WT+STZ,  $n = 5$ .

**Supplementary Figure 8** Schema depicting the retrograde interplay mediated by NMN. The downregulation of Sirt1 or iNAMPT by various conditions leads to NMN deficiency in proximal cells, which propagates to PECs or podocytes. The lower level of NMN in podocytes causes the downregulation of Sirt1, which upregulates Claudin-1 expression and leads to albuminuria.

## **Supplementary Results**

### **Effects of osmotic changes owing to high glucose medium in CM experiments**

To rule out the possibility of an osmotic effect induced by high glucose medium, experiments were also performed using mannitol (5 mM glucose+15 mM mannitol, Mann), which has the same osmotic pressure as HG (25 mM glucose). Immunoblotting showed that Sirt1 cDNA transfection induced an approximately 3-fold higher Sirt1 protein level in the NG+Sirt1 condition compared with the NG+Cont condition. Sirt1 expression was not reduced in the Mann+Cont condition (**Supplementary Fig. 6a**). Immunoblotting revealed an absence of Claudin-1 protein expression in all four groups of HK2 cells (**Supplementary Fig. 6b**). The medium NMN and intracellular NAD/NADH concentrations were similar in the NG+Cont, NG+Sirt1, Mann+Cont and Mann+Sirt1 conditions (**Supplementary Fig. 6c,d**). Exposure to the media collected from NG+Cont and NG+Sirt1 cells did not influence the podocytes. Moreover, the medium from Mann+Cont cells did not reduce the levels of Sirt1 and Claudin-1 in podocytes (**Supplementary Fig. 6e and 6f**). These data negated the possibility of osmotic effects induced by the high glucose medium.

**Supplementary Table 1. Genes that were up-regulated in the kidneys of TG+STZ mice compared with WT+STZ mice**

| Gene Symbol   | Gene Name                                                           | Fold Change | Genbank Accession |
|---------------|---------------------------------------------------------------------|-------------|-------------------|
| Gm5494        | predicted gene 5494                                                 | 23.423      | NM_001177529      |
| Gm14137       | predicted gene 14137                                                | 22.333      | NM_001039223      |
| Adipoq        | adiponectin, C1Q and collagen domain containing                     | 20.799      | NM_009605         |
| Gm1330        | predicted gene 1330                                                 | 19.591      | XM_485073         |
| Retnla        | resistin like alpha                                                 | 17.670      | NM_020509         |
| Popdc3        | popeye domain containing 3                                          | 16.303      | NM_024286         |
| Gm12836       | cytochrome P450, family 4, subfamily a, polypeptide 30a, pseudogene | 14.960      | XM_621635         |
| LOC634100     | similar to Ig heavy chain V region 108A precursor                   | 14.420      |                   |
| Kcnq5         | potassium voltage-gated channel, subfamily Q, member 5              | 13.217      | NM_023872         |
| LOC100046894  | similar to Igk-C protein                                            | 12.193      | XM_001477017      |
| H60a          | histocompatibility 60a                                              | 12.001      | NM_010400         |
| Mmp21         | matrix metalloproteinase 21                                         | 11.882      | NM_152944         |
| Cd160         | CD160 antigen                                                       | 11.234      | NM_018767         |
| LOC639930     | similar to Ig heavy chain V-I region HG3 precursor                  | 10.940      | U58290            |
| Brcal         | breast cancer 1                                                     | 10.818      | NM_009764         |
| 1700049L16Rik | hematological and neurological expressed 1-like pseudogene          | 10.707      | NR_003644         |
| H60b          | histocompatibility 60b                                              | 10.498      | NM_001177775      |
| LOC677643     | similar to Ig heavy chain V region 3 precursor                      | 10.295      | XR_031047         |
| LOC100046827  | similar to CG13990-PA                                               | 9.735       | XM_001476858      |
| Gm1409        | predicted gene 1409                                                 | 9.545       | XM_357633         |
| Olf118        | olfactory receptor 118                                              | 9.391       | NM_213721         |
| Fbxw26        | F-box and WD-40 domain protein 26                                   | 9.383       | NM_198674         |
| Gm4439        | predicted gene 4439                                                 | 9.001       | XM_001480174      |
| Vmn2r120      | vomeroneural 2, receptor 120                                        | 8.874       | NM_001104591      |
| Adcy10        | adenylate cyclase 10                                                | 8.432       | NM_173029         |

**Supplementary Table 2. Genes that were down-regulated in the kidneys of TG+STZ mice compared with WT+STZ mice**

| Gene Symbol   | Gene Name                                                                      | Fold<br>Change | Genbank<br>Accession |
|---------------|--------------------------------------------------------------------------------|----------------|----------------------|
| 2410017I17Rik | RIKEN cDNA 2410017I17 gene                                                     | 0.040          | AK082845             |
| Sycp1         | synaptonemal complex protein 1                                                 | 0.046          | NM_011516            |
| Zfp541        | zinc finger protein 541                                                        | 0.060          | NM_001099277         |
| Pcdhb19       | protocadherin beta 19                                                          | 0.060          | NM_053144            |
| LOC665788     | similar to spermiogenesis specific transcript on the Y 1                       | 0.060          | XM_001487820         |
| Try4          | trypsin 4                                                                      | 0.065          | NM_011646            |
| LOC674135     | similar to RT1 class I histocompatibility antigen, AA<br>alpha chain precursor | 0.067          | XR_004604            |
| 1700049E22Rik | RIKEN cDNA 1700049E22 gene                                                     | 0.071          | XM_001479989         |
| 4933426D04Rik | RIKEN cDNA 4933426D04 gene                                                     | 0.073          | AK016926             |
| Cldn1         | Claudin 1                                                                      | 0.077          | NM_016674            |
| Olf463        | olfactory receptor 463                                                         | 0.077          | NM_146413            |
| AI415467      | expressed sequence AI415467                                                    | 0.080          | EC277811             |
| Gm13011       | predicted gene 13011                                                           | 0.080          | NM_001126318         |
| Mro           | maestro                                                                        | 0.082          | NM_027741            |
| Cxcl5         | chemokine (C-X-C motif) ligand 5                                               | 0.083          | NM_009141            |
| C230055K05Rik | RIKEN cDNA C230055K05 gene                                                     | 0.083          | NM_001039231         |
| Try5          | trypsin 5                                                                      | 0.084          | NM_001003405         |
| Gm9495        | predicted gene 9495                                                            | 0.086          | XM_001475988         |
| Muc19         | mucin 19                                                                       | 0.087          | NM_207243            |
| Gm11201       | predicted gene 11201                                                           | 0.090          | AK154065             |
| Gm5112        | predicted gene 5112                                                            | 0.096          | XM_001480114         |
| Slfn1         | Schlafen-like 1                                                                | 0.105          | NM_177570            |
| 1700018F24Rik | RIKEN cDNA 1700018F24 gene                                                     | 0.107          | NM_027069            |
| Grem1         | gremlin 1                                                                      | 0.107          | NM_011824            |
| Kif7          | kinesin family member 7                                                        | 0.112          | NM_010626            |
| Gm6590        | predicted gene 6590                                                            | 0.113          | XM_001480319         |
| LOC100044228  | hypothetical protein LOC100044228                                              | 0.114          | XM_001471920         |
| Gm2931        | predicted gene 2931                                                            | 0.115          | XM_001475142         |
| 4930422I22Rik | RIKEN cDNA 4930422I22 gene                                                     | 0.123          | AK015180             |

**Supplementary Table 3. Clinical data of patients with diabetes and normal controls**

| <b>Sample name</b>          | <b>Gender</b> | <b>Age (years)</b> | <b>Serum creatine (mg/dL)</b> | <b>Proteinuria (g /day)</b> | <b>eGFR (ml/min/1.73m<sup>2</sup>)</b> | <b>HbA1c (%)</b> |
|-----------------------------|---------------|--------------------|-------------------------------|-----------------------------|----------------------------------------|------------------|
| <b>Diabetic Nephropathy</b> |               |                    |                               |                             |                                        |                  |
| <b>DN-1</b>                 | <b>male</b>   | <b>83</b>          | <b>1.81</b>                   | <b>1.6</b>                  | <b>28.5</b>                            | <b>6.6</b>       |
| <b>DN-2</b>                 | <b>male</b>   | <b>42</b>          | <b>1.13</b>                   | <b>4.9</b>                  | <b>58.1</b>                            | <b>6.3</b>       |
| <b>DN-3</b>                 | <b>male</b>   | <b>62</b>          | <b>1.73</b>                   | <b>1.5</b>                  | <b>32.6</b>                            | <b>6.1</b>       |
| <b>DN-4</b>                 | <b>male</b>   | <b>47</b>          | <b>1.82</b>                   | <b>5.4</b>                  | <b>33.4</b>                            | <b>6.1</b>       |
| <b>DN-5</b>                 | <b>male</b>   | <b>80</b>          | <b>1.23</b>                   | <b>10.2</b>                 | <b>44.0</b>                            | <b>6.0</b>       |
| <b>DN-6</b>                 | <b>male</b>   | <b>56</b>          | <b>2.93</b>                   | <b>12.0</b>                 | <b>18.9</b>                            | <b>6.4</b>       |
| <b>DN-7</b>                 | <b>male</b>   | <b>75</b>          | <b>1.57</b>                   | <b>1.4</b>                  | <b>33.6</b>                            | <b>6.1</b>       |
| <b>DN-8</b>                 | <b>male</b>   | <b>59</b>          | <b>1.88</b>                   | <b>0.5</b>                  | <b>71.2</b>                            | <b>5.8</b>       |
| <b>DN-9</b>                 | <b>female</b> | <b>64</b>          | <b>1.89</b>                   | <b>2.9</b>                  | <b>36.3</b>                            | <b>6.1</b>       |
| <b>DN-10</b>                | <b>female</b> | <b>51</b>          | <b>0.54</b>                   | <b>4.6</b>                  | <b>91.0</b>                            | <b>5.9</b>       |
| <b>DN-11</b>                | <b>male</b>   | <b>61</b>          | <b>0.69</b>                   | <b>7.7</b>                  | <b>89.0</b>                            | <b>7.2</b>       |
| <b>Controls</b>             |               |                    |                               |                             |                                        |                  |
| <b>CO-1</b>                 | <b>female</b> | <b>39</b>          | <b>0.61</b>                   | <b>&lt;0.1</b>              | <b>86.2</b>                            | <b>5.2</b>       |
| <b>CO-2</b>                 | <b>male</b>   | <b>27</b>          | <b>0.87</b>                   | <b>&lt;0.1</b>              | <b>88.1</b>                            | <b>4.9</b>       |
| <b>CO-3</b>                 | <b>female</b> | <b>51</b>          | <b>0.64</b>                   | <b>&lt;0.1</b>              | <b>76.7</b>                            | <b>5.3</b>       |
| <b>CO-4</b>                 | <b>female</b> | <b>35</b>          | <b>0.66</b>                   | <b>&lt;0.1</b>              | <b>84.9</b>                            | <b>5.0</b>       |
| <b>CO-5</b>                 | <b>male</b>   | <b>42</b>          | <b>0.83</b>                   | <b>&lt;0.1</b>              | <b>81.4</b>                            | <b>5.5</b>       |

Clinical parameters in patients with diabetic nephropathy (DN) at the time of needle renal biopsy or in living donors (CO; normal kidneys) at the time of pre-transplant biopsies.

**Supplementary Table 4. Sequences used for real-time PCR**

| Gene      | Sequences (5'-3')         |                                | Accession   |
|-----------|---------------------------|--------------------------------|-------------|
|           | Forward                   | Reverse                        |             |
| GAPDH     | CATCAGTCCTTCCACGATACCA    | CCTGCACCACCAACTGCTTA           | NM_008084.2 |
| Retnla    | TTGCCTGTGGATCTTGGGAG      | TTCTCCCTATGTTTCCTAACC          | NM_020509.3 |
| Kcnq5     | GGGCACAATCACACTGACAACC    | GAAAGAAATGCCAAGGAGTGCG         | NM_023872.3 |
| CD160     | TGCAGGATGCTGTTGGAACCC-    | CCTGTGCCCTGTTGCATTCTTG         | NM_018767.3 |
| BRCA1     | CCGGATACGAGAGTGAAACAA     | TGCTGCAGCTTTATCAGGTT           | NM_008676.3 |
| Pcdhb19   | TTTAGGAGAAACTACCTTGTGC    | TGAGCATTAAAGTCACTTGAGG         | NM_053144.2 |
| Claudin-1 | CCCAGTGGAAGATTACTCCTAGT   | TGCAAAGTACTGTTTCAGATTGAGC      | NM_016674.4 |
| Cxcl5     | CAT CGC CAG CGC TGG TCC T | GGG ATG AAC TCC TTG CGT GGT CT | NM_009141.2 |
| Grem1     | GCAAAACCCAGCCGCTTAA       | TGATGGTGCGACTGTTGCA            | NM_011824.4 |

**Supplementary Table 5. Primer sequences used for real-time PCR**

| Gene             | Sequences (5'-3')        |                            | Accession      |
|------------------|--------------------------|----------------------------|----------------|
|                  | Forward                  | Reverse                    |                |
| GAPDH            | CATCAGTCCTTCCACGATACCA   | CCTGCACCACCAACTGCTTA       | NM_008084.2    |
| Claudin-1        | CCCAGTGGAAGATTTACTCCTAGT | TGCAAAGTACTGTTTCAGATTTCAGC | NM_016674.4    |
| Dnmt1            | AGTGCAAGGCGTGCAAAGATATGG | TGGGTGATGGCATCTCTGACACAT   | NM_010066.3    |
| Sirt1            | GATCCTTCAGTGTCATGGTT     | GAAGACAATCTCTGGCTTCA       | NM_019812      |
| $\beta$ -catenin | TCAGAGGGTCCGAGCTGCCA     | TGTCAGCTCAGGAATTGCAC       | NM_001081088   |
| Snail            | GAGGCGGTGGCAGACTAG       | GACACATCGGTCAGACCAG        | NM_011040      |
| Synaptopodin     | TGGACTGGTGGACATTGAAA     | TTTACAACGGTCTGTGGTGA       | NM_019459.2    |
| Podocin          | GTGTCCAAAGCCATCCAGTT     | GACCTTTCCTTCTCGTAACG       | NM_001163574.1 |

**Supplementary Table 6. Primer sequences used for methylation-specific PCR**

| Primer set                             | Primer sequence (5'→3')                                                             | Product size | Sequence number    | Annealing temperature |
|----------------------------------------|-------------------------------------------------------------------------------------|--------------|--------------------|-----------------------|
| Human Claudin-1-M methylated primers   | Forward:<br>GTTGTAGTTGTTGGGTTTTATTTTC<br>Reverse;<br>AACCTAAACGATCACGATATTATCG      | 121          | 255–279<br>375–399 | 65°C                  |
| Human Claudin-1-U unmethylated primers | Forward;<br>GGTTGTAGTTGTTGGGTTTTATTTTT<br>Reverse;<br>TACATAACCTAAACAATCACAATATTATC | 127          | 254–279<br>380–409 | 65°C                  |
